# Supplementary material for: Transcriptomic insights on the virulence-controlling CsrA, BadR, RpoN, and RpoS regulatory networks in the Lyme disease spirochete
Source: PLoS One. 2018 Aug 30;13(8):e0203286. doi: 10.1371/journal.pone.0203286 (PMC6117026; doi:10.1371/journal.pone.0203286)
Supplement: S4 Table — Contains the entire set of transcripts that were differentially expressed under any condition and what condition they were impacted by. A total of 331 transcripts, including those mutated, were differentially expressed across our total data set. The first column is the gene information, for the ncRNAs it contains the location relative to other genes and for predicted or known genes it contains gene name. The second column contains the CDS/custom transcript ID which is the transcript ID for all coding sequences obtained from the NCBI Gene file format file or the transcript ID given to ncRNAs. RefSeq entries are further separated by the character “_”. The first portion gives the genetic element from which it is derived, the second describes the type of element (CDS), the third provides RefSeq ID, and the fourth provides a number indicating the particular entries ordered number in the RefSeq entry. The following 8 columns are given as each mutant and increased abundance or decreased abundance. If a transcript was differentially expressed in a condition it’s cell value is given as TRUE. Empty cells indicate that a transcript was not impacted by a given condition. ORFs and ncRNAs are listed according to the numerical order assigned to genes and replicons by the initial genome sequencing of B. burgdorferi strain B31 (13, 69). (XLSX) [file pone.0203286.s005.xlsx]

## Sheet: Intersection_Table.csv
Supplemental Table 2: Intersection results
Transcript	Gene	RpoN Up	RpoN Down	RpoS Up	RpoS Down	BadR Up	BadR Down	CsrA Up	CsrA Down
rna11	tRNA-Ile-1						TRUE
ncRNA0353	IA-(BB_Q85/BB_Q88,BB_Q88)								TRUE
ncRNA0344	A-(BB_Q52)								TRUE
ncRNA0337	I-(BB_Q37/BB_Q38)					TRUE
ncRNA0330	p-(BB_Q04)						TRUE
ncRNA0328	I-(BB_A73/BB_A74)								TRUE
ncRNA0327	I-(BB_A68/BB_A69)					TRUE		TRUE
ncRNA0326	I-(BB_A66/BB_A68)					TRUE		TRUE
ncRNA0325	A-(BB_A66)								TRUE
ncRNA0322	I-(BB_A37/BB_A38)						TRUE		TRUE
ncRNA0318	IP-(BB_A16/BB_A18,BB_A18)						TRUE		TRUE
ncRNA0317	I-(BB_A16/BB_A18)			TRUE
ncRNA0311	A-(BB_A04)					TRUE		TRUE
ncRNA0310	Ip-(BB_J50/BB_J51,BB_J51)								TRUE
ncRNA0308	I-(BB_J50/BB_J51)						TRUE		TRUE
ncRNA0307	IA-(BB_J37/BB_J41,BB_J41)							TRUE
ncRNA0306	I-(BB_J37/BB_J41)							TRUE
ncRNA0304	I-(BB_J37/BB_J41)						TRUE		TRUE
ncRNA0300	I-(BB_J20/BB_J0058)								TRUE
ncRNA0299	I-(BB_J20/BB_J0058)						TRUE		TRUE
ncRNA0297	A-(BB_J18)						TRUE		TRUE
ncRNA0289	AIA-(BB_K33,BB_K33/BB_K34,BB_K34)								TRUE
ncRNA0287	I-(BB_K55/BB_K56)								TRUE
ncRNA0286	A-(BB_K19)						TRUE		TRUE
ncRNA0285	A-(BB_K19)								TRUE
ncRNA0284	A-(BB_K17)						TRUE		TRUE
ncRNA0281	IpI-(BB_K09/BB_K10,BB_K10,BB_K10/BB_K12)						TRUE		TRUE
ncRNA0271	P-(BB_H30)								TRUE
ncRNA0263	IA-(BB_G28/BB_G29,BB_G29)								TRUE
ncRNA0259	AA-(BB_G07,BB_G08)					TRUE		TRUE
ncRNA0257	PI-(BB_G05,BB_G05/BB_G06)						TRUE		TRUE
ncRNA0255	I-(BB_F0040/BB_F32)								TRUE
ncRNA0253	pIp-(BB_F14a,BB_F14a/BB_F16,BB_F16)								TRUE
ncRNA0252	Ip-(BB_F14/BB_F14a,BB_F14a)								TRUE
ncRNA0251	I-(BB_F11a/BB_F12)		TRUE						TRUE
ncRNA0250	PI-(BB_F11a,BB_F11a/BB_F12)								TRUE
ncRNA0249	pI-(BB_F05,BB_F05/BB_F06)								TRUE
ncRNA0248	AIP-(BB_F03,BB_F03/BB_F05,BB_F05)								TRUE
ncRNA0247	A-(BB_F03)		TRUE						TRUE
ncRNA0246	I-(BB_E31/BB_E33)								TRUE
ncRNA0245	I-(BB_E31/BB_E33)						TRUE		TRUE
ncRNA0242	I-(BB_E23b/BB_E29a)						TRUE		TRUE
ncRNA0240	A-(BB_E09)						TRUE		TRUE
ncRNA0239	A-(BB_E09)						TRUE		TRUE
ncRNA0235	A-(BB_U05)						TRUE
ncRNA0233	p-(BB_D23)						TRUE		TRUE
ncRNA0232	I-(BB_D22/BB_D23)								TRUE
ncRNA0231	p-(BB_D20)								TRUE
ncRNA0229	I-(BB_D18/BB_D20)						TRUE		TRUE
ncRNA0226	P-(BB_D05a)						TRUE		TRUE
ncRNA0225	I-(BB_D04/BB_D05a)						TRUE
ncRNA0218	IA-(BB_N32/BB_N33,BB_N33)					TRUE		TRUE
ncRNA0205	A-(BB_L36)						TRUE
ncRNA0200	IA-(BB_L29/BB_L30,BB_L30)						TRUE		TRUE
ncRNA0191	A-(BB_O44)						TRUE		TRUE
ncRNA0188	A-(BB_O36)						TRUE
ncRNA0187	A-(BB_O36)								TRUE
ncRNA0186	AIA-(BB_O32,BB_O32/BB_O33,BB_O33)					TRUE		TRUE
ncRNA0185	I-(BB_O29/BB_O30)					TRUE		TRUE
ncRNA0168	A-(BB_R43)								TRUE
ncRNA0154	A-(BB_S11)						TRUE
ncRNA0153	AIA-(BB_P35,BB_P35/BB_P36,BB_P36)								TRUE
ncRNA0152	IA-(BB_P32/BB_P33,BB_P33)					TRUE		TRUE
ncRNA0150	I-(BB_P29/BB_P30)					TRUE
ncRNA0148	A-(BB_P21)						TRUE		TRUE
ncRNA0144	AIA-(BB_P01,BB_P01/BB_P02,BB_P02)								TRUE
ncRNA0136	AI-(BB_B09,BB_B09/BB_B10)						TRUE		TRUE
ncRNA0135	I-(BB_B03/BB_B04)					TRUE
ncRNA0134	AI-(BB_B03,BB_B03/BB_B04)					TRUE
ncRNA0133	A-(BB_B03)						TRUE		TRUE
ncRNA0132	pI-(BB_0845a,BB_0845a/BB_0845b)						TRUE		TRUE
ncRNA0125	AIA-(BB_0794,BB_0794/BB_0795,BB_0795)						TRUE		TRUE
ncRNA0117	A-(BB_0747)						TRUE
ncRNA0110	A-(BB_0697)						TRUE
ncRNA0105	A-(BB_0660)						TRUE
ncRNA0099	A-(BB_0633)						TRUE		TRUE
ncRNA0087	A-(BB_0588)						TRUE		TRUE
ncRNA0084	A-(BB_0581)						TRUE		TRUE
ncRNA0083	AI-(BB_0556,BB_0556/BB_0557)						TRUE
ncRNA0080	p-(BB_0522)						TRUE		TRUE
ncRNA0076	AA-(BB_0465,BB_0466)						TRUE
ncRNA0073	I-(BB_t06/BB_0461)					TRUE		TRUE
ncRNA0072	A-(BB_0454)					TRUE		TRUE
ncRNA0071	A-(BB_0450)		TRUE				TRUE		TRUE
ncRNA0070	A-(BB_0446)						TRUE		TRUE
ncRNA0063	A-(BB_0381)						TRUE		TRUE
ncRNA0061	A-(BB_0374)						TRUE
ncRNA0057	A-(BB_0347)						TRUE		TRUE
ncRNA0050	AIA-(BB_0269,BB_0269/BB_0270,BB_0270)						TRUE		TRUE
ncRNA0043	A-(BB_0244)						TRUE		TRUE
ncRNA0042	A-(BB_0240)						TRUE		TRUE
ncRNA0037	A-(BB_0211)						TRUE		TRUE
ncRNA0035	A-(BB_0208)						TRUE		TRUE
ncRNA0031	AA-(BB_0198,BB_0199)						TRUE		TRUE
ncRNA0014	A-(BB_0084)						TRUE		TRUE
ncRNA0007	A-(BB_0014)						TRUE		TRUE
ncRNA0006	A-(BB_0013)						TRUE		TRUE
ncRNA0003	AA-(BB_0005,BB_0006)						TRUE		TRUE
ncRNA0002	AI-(BB_0004,BB_0004/BB_0005)						TRUE		TRUE
ncRNA0001	PI-(BB_0003,BB_0003/BB_0004)						TRUE
lcl|NC_001903.1_cds_NP_047015.1_821	BB_B29						TRUE	TRUE
lcl|NC_001903.1_cds_NP_047014.1_820	BB_B28							TRUE
lcl|NC_001903.1_cds_NP_047013.1_819	BB_B27							TRUE
lcl|NC_001903.1_cds_NP_047009.2_815	BB_B23							TRUE
lcl|NC_001903.1_cds_NP_047005.1_813	ospC								TRUE
lcl|NC_001903.1_cds_NP_047004.2_812	guaA							TRUE
lcl|NC_001903.1_cds_NP_046996.1_806	BB_B10						TRUE
lcl|NC_001903.1_cds_NP_046993.1_804	BB_B07					TRUE		TRUE
lcl|NC_001903.1_cds_NP_046992.2_803	chbB					TRUE		TRUE
lcl|NC_001903.1_cds_NP_046991.1_802	chbA					TRUE		TRUE
lcl|NC_001903.1_cds_NP_046990.2_801	chbC					TRUE		TRUE
lcl|NC_001903.1_cds_NP_046988.1_799	BB_B02							TRUE
lcl|NC_001903.1_cds_NP_046987.2_798	BB_B01							TRUE
lcl|NC_001857.2_cds_YP_004940408.1_1337	BB_A0078								TRUE
lcl|NC_001857.2_cds_NP_045747.1_1339	osm28					TRUE		TRUE
lcl|NC_001857.2_cds_NP_045746.1_1338	BB_A73								TRUE
lcl|NC_001857.2_cds_NP_045739.1_1334	BB_A66					TRUE
lcl|NC_001857.2_cds_NP_045738.1_1333	BB_A65								TRUE
lcl|NC_001857.2_cds_NP_045733.1_1329	BB_A60					TRUE		TRUE
lcl|NC_001857.2_cds_NP_045731.1_1327	BB_A58					TRUE		TRUE
lcl|NC_001857.2_cds_NP_045727.1_1325	BB_A54					TRUE		TRUE
lcl|NC_001857.2_cds_NP_045726.1_1324	BB_A53					TRUE		TRUE
lcl|NC_001857.2_cds_NP_045725.1_1323	BB_A52					TRUE		TRUE
lcl|NC_001857.2_cds_NP_045710.1_1311	BB_A37						TRUE		TRUE
lcl|NC_001857.2_cds_NP_045709.2_1310	BB_A36								TRUE
lcl|NC_001857.2_cds_NP_045707.1_1309	BB_A34						TRUE		TRUE
lcl|NC_001857.2_cds_NP_045705.1_1307	BB_A32					TRUE
lcl|NC_001857.2_cds_NP_045704.1_1306	BB_A31					TRUE		TRUE
lcl|NC_001857.2_cds_NP_045703.1_1305	BB_A30					TRUE		TRUE
lcl|NC_001857.2_cds_NP_045698.1_1304	dbpB								TRUE
lcl|NC_001857.2_cds_NP_045697.1_1303	dbpA						TRUE
lcl|NC_001857.2_cds_NP_045696.2_1302	BB_A23						TRUE
lcl|NC_001857.2_cds_NP_045677.1_1288	BB_A04					TRUE
lcl|NC_001857.2_cds_NP_045676.1_1287	BB_A03					TRUE		TRUE
lcl|NC_001856.1_cds_NP_045669.1_1277	BB_J45						TRUE
lcl|NC_001856.1_cds_NP_045667.1_1276	BB_J43						TRUE		TRUE
lcl|NC_001856.1_cds_NP_045661.2_1273	BB_J37						TRUE
lcl|NC_001856.1_cds_NP_045660.1_1272	BB_J36						TRUE
lcl|NC_001856.1_cds_NP_045650.1_1266	BB_J26								TRUE
lcl|NC_001856.1_cds_NP_045648.1_1264	BB_J24						TRUE		TRUE
lcl|NC_001856.1_cds_NP_045647.2_1263	BB_J23								TRUE
lcl|NC_001856.1_cds_NP_045643.1_1260	BB_J19						TRUE		TRUE
lcl|NC_001856.1_cds_NP_045642.1_1259	BB_J18						TRUE
lcl|NC_001856.1_cds_NP_045633.1_1254	BB_J09					TRUE		TRUE
lcl|NC_001855.1_cds_YP_004940637.1_1241	BB_K0058								TRUE
lcl|NC_001855.1_cds_YP_004940636.1_1236	BB_K54								TRUE
lcl|NC_001855.1_cds_NP_045624.1_1252	BB_K53						TRUE		TRUE
lcl|NC_001855.1_cds_NP_045623.1_1251	BB_K52								TRUE
lcl|NC_001855.1_cds_NP_045620.1_1248	BB_K49					TRUE		TRUE
lcl|NC_001855.1_cds_NP_045618.1_1246	BB_K47					TRUE		TRUE
lcl|NC_001855.1_cds_NP_045612.1_1242	BB_K40						TRUE		TRUE
lcl|NC_001855.1_cds_NP_045607.1_1239	BB_K34								TRUE
lcl|NC_001855.1_cds_NP_045606.1_1238	BB_K33						TRUE		TRUE
lcl|NC_001855.1_cds_NP_045605.1_1237	BB_K32								TRUE
lcl|NC_001855.1_cds_NP_045598.1_1235	BB_K24						TRUE		TRUE
lcl|NC_001855.1_cds_NP_045597.1_1234	BB_K23						TRUE		TRUE
lcl|NC_001855.1_cds_NP_045596.1_1233	BB_K22								TRUE
lcl|NC_001855.1_cds_NP_045575.1_1225	BB_K01					TRUE
lcl|NC_001853.1_cds_NP_045517.1_1197	BB_H26						TRUE		TRUE
lcl|NC_001853.1_cds_NP_045516.1_1196	BB_H25								TRUE
lcl|NC_001853.1_cds_NP_045510.1_1195	BB_H17						TRUE		TRUE
lcl|NC_001853.1_cds_NP_045498.1_1188	BB_H04								TRUE
lcl|NC_001852.1_cds_NP_045491.2_1183	BB_G31						TRUE
lcl|NC_001852.1_cds_NP_045489.1_1181	BB_G29						TRUE
lcl|NC_001852.1_cds_NP_045485.1_1177	BB_G25						TRUE
lcl|NC_001852.1_cds_NP_045484.2_1176	BB_G24						TRUE
lcl|NC_001852.1_cds_NP_045482.1_1174	BB_G22						TRUE		TRUE
lcl|NC_001852.1_cds_NP_045481.1_1172	BB_G21								TRUE
lcl|NC_001852.1_cds_NP_045472.1_1163	BB_G12						TRUE		TRUE
lcl|NC_001852.1_cds_NP_045464.1_1159	BB_G02							TRUE
lcl|NC_001851.2_cds_YP_004940414.1_1157	BB_F0041								TRUE
lcl|NC_001851.2_cds_YP_004940411.1_1149	BB_F17								TRUE
lcl|NC_001851.2_cds_YP_004940410.1_1147	BB_F0034								TRUE
lcl|NC_001851.2_cds_YP_004940409.1_1142	arp								TRUE
lcl|NC_001851.2_cds_NP_045459.1_1154	BB_F26								TRUE
lcl|NC_001851.2_cds_NP_045458.1_1153	BB_F25					TRUE			TRUE
lcl|NC_001851.2_cds_NP_045457.1_1152	BB_F24								TRUE
lcl|NC_001851.2_cds_NP_045456.1_1151	BB_F23		TRUE			TRUE
lcl|NC_001851.2_cds_NP_045453.2_1150	BB_F20		TRUE						TRUE
lcl|NC_001851.2_cds_NP_045449.2_1148	BB_F14								TRUE
lcl|NC_001851.2_cds_NP_045444.1_1146	BB_F08								TRUE
lcl|NC_001851.2_cds_NP_045442.1_1145	BB_F06								TRUE
lcl|NC_001851.2_cds_NP_045439.1_1144	repU		TRUE			TRUE			TRUE
lcl|NC_001850.1_cds_NP_045436.1_1141	BB_E31								TRUE
lcl|NC_001850.1_cds_NP_045428.1_1139	BB_E21								TRUE
lcl|NC_001850.1_cds_NP_045416.1_1133	BB_E09								TRUE
lcl|NC_001849.2_cds_YP_004940417.1_1121	BB_D0031						TRUE		TRUE
lcl|NC_001849.2_cds_NP_045405.1_1120	BB_D22						TRUE		TRUE
lcl|NC_001849.2_cds_NP_045404.1_1119	BB_D21						TRUE		TRUE
lcl|NC_001849.2_cds_NP_045399.2_1117	BB_D15						TRUE
lcl|NC_001849.2_cds_NP_045398.1_1116	BB_D14						TRUE		TRUE
lcl|NC_001849.2_cds_NP_045397.1_1115	BB_D13						TRUE		TRUE
lcl|NC_001849.2_cds_NP_045388.1_1111	BB_D04								TRUE
lcl|NC_001318.1_cds_YP_008686594.1_748	BB_0794						TRUE		TRUE
lcl|NC_001318.1_cds_YP_008686589.1_694	BB_0739						TRUE
lcl|NC_001318.1_cds_YP_008686588.1_680	cabP						TRUE		TRUE
lcl|NC_001318.1_cds_YP_008686584.1_588	BB_0627						TRUE
lcl|NC_001318.1_cds_NP_212985.1_797	BB_0852						TRUE
lcl|NC_001318.1_cds_NP_212977.2_795	BB_0843					TRUE
lcl|NC_001318.1_cds_NP_212976.2_794	arcB					TRUE		TRUE
lcl|NC_001318.1_cds_NP_212975.1_793	arcA					TRUE		TRUE
lcl|NC_001318.1_cds_NP_212932.1_752	BB_0798						TRUE		TRUE
lcl|NC_001318.1_cds_NP_212919.1_739	spoVG					TRUE		TRUE
lcl|NC_001318.1_cds_NP_212907.1_727	BB_0773					TRUE		TRUE
lcl|NC_001318.1_cds_NP_212905.1_724	rpoS			TRUE
lcl|NC_001318.1_cds_NP_212904.1_723	BB_0770					TRUE		TRUE
lcl|NC_001318.1_cds_NP_212903.1_722	BB_0769					TRUE		TRUE
lcl|NC_001318.1_cds_NP_212902.1_721	BB_0768					TRUE		TRUE
lcl|NC_001318.1_cds_NP_212901.1_720	murG					TRUE		TRUE
lcl|NC_001318.1_cds_NP_212900.1_719	cvpA					TRUE		TRUE
lcl|NC_001318.1_cds_NP_212899.1_718	BB_0765					TRUE
lcl|NC_001318.1_cds_NP_212830.1_655	BB_0696						TRUE
lcl|NC_001318.1_cds_NP_212829.1_654	rpsP						TRUE
lcl|NC_001318.1_cds_NP_212828.2_653	ffh						TRUE		TRUE
lcl|NC_001318.1_cds_NP_212827.1_652	badR						TRUE
lcl|NC_001318.1_cds_NP_212818.2_644	fni						TRUE
lcl|NC_001318.1_cds_NP_212817.1_643	BB_0683						TRUE
lcl|NC_001318.1_cds_NP_212815.2_641	BB_0681					TRUE
lcl|NC_001318.1_cds_NP_212813.2_639	BB_0679					TRUE		TRUE
lcl|NC_001318.1_cds_NP_212812.1_638	BB_0678					TRUE		TRUE
lcl|NC_001318.1_cds_NP_212778.1_604	nanE					TRUE		TRUE
lcl|NC_001318.1_cds_NP_212777.1_603	ylqF						TRUE
lcl|NC_001318.1_cds_NP_212773.1_599	potD					TRUE		TRUE
lcl|NC_001318.1_cds_NP_212772.1_598	BB_0638					TRUE		TRUE
lcl|NC_001318.1_cds_NP_212771.2_597	BB_0637					TRUE		TRUE
lcl|NC_001318.1_cds_NP_212760.1_587	rnmV						TRUE		TRUE
lcl|NC_001318.1_cds_NP_212751.1_578	BB_0617							TRUE
lcl|NC_001318.1_cds_NP_212737.1_565	p66					TRUE
lcl|NC_001318.1_cds_NP_212732.1_560	murB						TRUE
lcl|NC_001318.1_cds_NP_212722.1_550	BB_0588						TRUE		TRUE
lcl|NC_001318.1_cds_NP_212711.1_539	BB_0577						TRUE		TRUE
lcl|NC_001318.1_cds_NP_212696.1_524	BB_0562					TRUE		TRUE
lcl|NC_001318.1_cds_NP_212677.2_505	BB_0543						TRUE
lcl|NC_001318.1_cds_NP_212672.1_501	BB_0538							TRUE
lcl|NC_001318.1_cds_NP_212671.1_500	BB_0537					TRUE		TRUE
lcl|NC_001318.1_cds_NP_212667.1_496	BB_0533						TRUE
lcl|NC_001318.1_cds_NP_212652.1_488	dnaK							TRUE
lcl|NC_001318.1_cds_NP_212643.1_482	BB_0509						TRUE		TRUE
lcl|NC_001318.1_cds_NP_212620.2_459	rpmC							TRUE
lcl|NC_001318.1_cds_NP_212599.1_440	BB_0465						TRUE
lcl|NC_001318.1_cds_NP_212588.1_429	BB_0454						TRUE
lcl|NC_001318.1_cds_NP_212585.1_426	BB_0451					TRUE		TRUE
lcl|NC_001318.1_cds_NP_212584.1_425	rpoN		TRUE
lcl|NC_001318.1_cds_NP_212583.1_424	BB_0449	TRUE
lcl|NC_001318.1_cds_NP_212574.1_415	rpmH						TRUE
lcl|NC_001318.1_cds_NP_212568.1_409	BB_0434						TRUE		TRUE
lcl|NC_001318.1_cds_NP_212564.2_406	BB_0430						TRUE
lcl|NC_001318.1_cds_NP_212563.1_405	BB_0429						TRUE
lcl|NC_001318.1_cds_NP_212562.1_404	BB_0428						TRUE
lcl|NC_001318.1_cds_NP_212561.2_403	BB_0427						TRUE
lcl|NC_001318.1_cds_NP_212549.1_394	BB_0415						TRUE		TRUE
lcl|NC_001318.1_cds_NP_212542.1_389	fruA1					TRUE		TRUE
lcl|NC_001318.1_cds_NP_212541.1_388	manA							TRUE
lcl|NC_001318.1_cds_NP_212530.1_377	rpmG						TRUE
lcl|NC_001318.1_cds_NP_212510.1_357	metK					TRUE
lcl|NC_001318.1_cds_NP_212499.1_346	la7					TRUE		TRUE
lcl|NC_001318.1_cds_NP_212498.1_345	mgsA					TRUE		TRUE
lcl|NC_001318.1_cds_NP_212477.1_326	gatC						TRUE
lcl|NC_001318.1_cds_NP_212468.1_317	BB_0334							TRUE
lcl|NC_001318.1_cds_NP_212465.1_314	BB_0331					TRUE
lcl|NC_001318.1_cds_NP_212464.1_313	BB_0330					TRUE		TRUE
lcl|NC_001318.1_cds_NP_212419.2_270	BB_0285						TRUE		TRUE
lcl|NC_001318.1_cds_NP_212377.1_228	glpD					TRUE
lcl|NC_001318.1_cds_NP_212376.1_227	BB_0242					TRUE
lcl|NC_001318.1_cds_NP_212375.1_226	glpK					TRUE
lcl|NC_001318.1_cds_NP_212374.1_225	glpF					TRUE
lcl|NC_001318.1_cds_NP_212319.1_174	BB_0185							TRUE
lcl|NC_001318.1_cds_NP_212318.1_173	csrA								TRUE
lcl|NC_001318.1_cds_NP_212306.2_161	BB_0172						TRUE		TRUE
lcl|NC_001318.1_cds_NP_212300.1_155	malQ					TRUE
lcl|NC_001318.1_cds_NP_212174.1_38	cheR						TRUE
lcl|NC_001318.1_cds_NP_212169.1_33	BB_0035					TRUE		TRUE
lcl|NC_001318.1_cds_NP_212161.1_25	BB_0027						TRUE		TRUE
lcl|NC_001318.1_cds_NP_212160.1_24	BB_0026						TRUE
lcl|NC_001318.1_cds_NP_212157.1_21	ruvA						TRUE
lcl|NC_001318.1_cds_NP_212156.1_20	ruvB						TRUE		TRUE
lcl|NC_001318.1_cds_NP_212144.1_9	BB_0010						TRUE
lcl|NC_001318.1_cds_NP_212142.2_7	cdaA						TRUE
lcl|NC_001318.1_cds_NP_212138.2_3	BB_0004						TRUE		TRUE
lcl|NC_000957.1_cds_NP_051541.1_1284	BB_T04						TRUE		TRUE
lcl|NC_000956.1_cds_NP_051533.1_1388	BB_Q85								TRUE
lcl|NC_000956.1_cds_NP_051521.1_1385	BB_Q62					TRUE		TRUE
lcl|NC_000956.1_cds_NP_051504.1_1374	bdrV					TRUE		TRUE
lcl|NC_000956.1_cds_NP_051502.1_1373	BB_Q40					TRUE		TRUE
lcl|NC_000956.1_cds_NP_051494.1_1366	BB_Q32					TRUE
lcl|NC_000956.1_cds_NP_051491.1_1363	BB_Q29					TRUE
lcl|NC_000956.1_cds_NP_051489.1_1361	BB_Q27					TRUE		TRUE
lcl|NC_000956.1_cds_NP_051469.1_1342	BB_Q05					TRUE
lcl|NC_000954.1_cds_NP_051450.1_1094	erpQ					TRUE		TRUE
lcl|NC_000954.1_cds_NP_051446.1_1090	bdrQ					TRUE		TRUE
lcl|NC_000954.1_cds_NP_051445.1_1089	BB_N33					TRUE		TRUE
lcl|NC_000954.1_cds_NP_051444.1_1088	BB_N32					TRUE		TRUE
lcl|NC_000954.1_cds_NP_051443.1_1087	BB_N31					TRUE		TRUE
lcl|NC_000953.1_cds_NP_051417.1_1062	erpO					TRUE
lcl|NC_000953.1_cds_NP_051392.1_1039	BB_L15						TRUE
lcl|NC_000953.1_cds_NP_051387.1_1034	BB_L10						TRUE		TRUE
lcl|NC_000952.1_cds_NP_051373.1_1021	erpM					TRUE
lcl|NC_000952.1_cds_NP_051372.1_1020	erpL								TRUE
lcl|NC_000952.1_cds_NP_051368.1_1016	BB_O35					TRUE
lcl|NC_000952.1_cds_NP_051366.1_1014	BB_O33							TRUE
lcl|NC_000952.1_cds_NP_051365.1_1013	BB_O32					TRUE		TRUE
lcl|NC_000952.1_cds_NP_051362.1_1010	BB_O29								TRUE
lcl|NC_000952.1_cds_NP_051338.1_986	BB_O05								TRUE
lcl|NC_000951.1_cds_NP_051330.1_979	BB_M39								TRUE
lcl|NC_000951.1_cds_NP_051329.2_978	erpK								TRUE
lcl|NC_000951.1_cds_NP_051316.1_965	BB_M25					TRUE
lcl|NC_000951.1_cds_NP_051301.1_951	BB_M10								TRUE
lcl|NC_000950.1_cds_NP_051282.1_934	bppA								TRUE
lcl|NC_000950.1_cds_NP_051281.1_933	BB_R34					TRUE		TRUE
lcl|NC_000950.1_cds_NP_051280.1_932	BB_R33							TRUE
lcl|NC_000950.1_cds_NP_051278.1_930	BB_R31								TRUE
lcl|NC_000950.1_cds_NP_051274.2_927	bdrH						TRUE		TRUE
lcl|NC_000950.1_cds_NP_051272.1_925	BB_R25					TRUE
lcl|NC_000949.1_cds_NP_051241.2_895	bppA								TRUE
lcl|NC_000949.1_cds_NP_051240.1_894	bdrE					TRUE		TRUE
lcl|NC_000949.1_cds_NP_051238.1_893	BB_S35					TRUE		TRUE
lcl|NC_000949.1_cds_NP_051237.1_892	BB_S34							TRUE
lcl|NC_000949.1_cds_NP_051234.2_890	BB_S31						TRUE		TRUE
lcl|NC_000949.1_cds_NP_051229.2_886	BB_S26					TRUE
lcl|NC_000949.1_cds_NP_051218.1_876	BB_S15					TRUE
lcl|NC_000948.1_cds_NP_051200.1_859	erpB					TRUE
lcl|NC_000948.1_cds_NP_051197.1_856	bppB								TRUE
lcl|NC_000948.1_cds_NP_051196.1_855	bppA								TRUE
lcl|NC_000948.1_cds_NP_051195.1_854	bdrA					TRUE		TRUE
lcl|NC_000948.1_cds_NP_051194.2_853	BB_P33					TRUE		TRUE
lcl|NC_000948.1_cds_NP_051193.1_852	BB_P32					TRUE		TRUE
lcl|NC_000948.1_cds_NP_051192.1_851	BB_P31					TRUE		TRUE
lcl|NC_000948.1_cds_NP_051190.1_849	BB_P29								TRUE
lcl|NC_000948.1_cds_NP_051187.2_846	BB_P26					TRUE
lcl|NC_000948.1_cds_NP_051176.1_835	BB_P15						TRUE
lcl|NC_000948.1_cds_NP_051171.1_830	BB_P10						TRUE		TRUE
